# Supplementary material for: Mechanism of Antitumor Effects of Saffron in Human Prostate Cancer Cells
Source: MDPI journal article supplement (doi:10.3390/nu16010114), 2023-12-28
Supplement: s1 [file s1]

Supplementary Table S1

Table S1: Primer sequence information.

|                            | Forward Primer                         | Reverse Primer                        | TaqMan Probe Sequence                   |
|----------------------------|----------------------------------------|---------------------------------------|-----------------------------------------|
| Primer sequence for RT-PCR |                                        |                                       |                                         |
| β-actin                    | 5'-<br>AGTCCCTTGCCATCCTAAAAG-<br>3'    | 5'-<br>CAATGCTATCACCTCCCCTG-<br>3'    | 5'-<br>CCAGTCCTCTCCCAAGTCCACAC-<br>3'   |
| p53                        | 5'-<br>CTCCTCAGCATCTTATCCGAGT<br>G-3'  | 5'-<br>GGTGGTACAGTCAGAGCCAA<br>C-3'   | 5'-<br>AGGCGGCTCATAGGGCACCACCA-<br>3'   |
| MST1R                      | 5'-<br>GCGTAGATGGTGAATGTCATAT<br>CC-3' | 5'-<br>GCTGAAGACCAGTGCAGTCG-<br>3'    | 5'-<br>CCACAAGCAGCAGCAAAGGCAGC<br>A-3'  |
| WDR70                      | 5'-<br>CAGTGTCTGCTTTGGGTCTGG-<br>3'    | 5'-<br>TCACAGGGCTGAAGGGATCG-<br>3     | 5'-<br>CCCTCAGGTGCCCCGTTTGGTGACA<br>-3' |
| RECQ5                      | 5'-<br>GGCAGCTTCATCCTCCTTCC-3'         | 5'-<br>TCATCCACCACCAAGTAAGAC<br>AG-3' | 5'-<br>CCCTGCCCTCCCTGGTGTCCCGC<br>C-3'  |
| WRN                        | 5'-<br>GCCTCTCATGACAATTGGCATG<br>-3'   | 5'-<br>GAGTTGGACGGGAGGGTTTC<br>G-3'   | 5'-<br>CCCAAGCGGTGAAAGCTGGCTGC<br>C-3'  |
| SIRT1                      | 5'-<br>CCTGTGAAAGTGATGAGGAGG<br>ATAG-3 | 5'-TTGGATTCCCGCAACCTG-3               | 5'-TCACCACCTAACCTATGACAC-3'             |
| EHMT2                      | 5'-TCAAAACCGCTTTCCTGG-3'               | 5'-TGTCCCAATGGTCAGCA-3'               | 5'-AGTGTCCATGCTACCTGGCTGT-<br>3'        |
| MGMT                       | 5'-AAAGGTACGGGCCATTTGG-<br>3'          | 5'-GGCGCCTTCCCAGCTT-3'                | 5'- TAAGGCACAGAGAGCCTC-3'               |

Supplementary Table S1

|                                         |                                       |                                         |                                          |
|-----------------------------------------|---------------------------------------|-----------------------------------------|------------------------------------------|
| COMT                                    | 5'-<br>CTACTGGCTGACAACGTGATCT<br>G-3' | 5'-<br>GTATTCCAGGAACGATTGGTA<br>GTGT-3' | 5'-<br>TGC GCCAGACTTCCTAGCACACGT<br>G-3' |
| <b>Primer sequence for standard PCR</b> |                                       |                                         |                                          |
| BCL-2                                   | 5'-<br>ATGTGTGTGGAGAGCGTCAAC<br>C-3'  | 5'-<br>TGAGCAGAGTCTTCAGAGACA<br>GCC-3'  |                                          |
| IL-2                                    | 5'-CGCATCCTTAAGCAGCAACC-<br>3'        | 5'-<br>CGCATCCTTAAGCAGCAACC-<br>3'      |                                          |
| $\beta$ -actin                          | 5'-<br>AGTCCCTTGCCATCCTAAAAG-<br>3'   | 5'-<br>CAATGCTATCACCTCCCCTG-<br>3'      |                                          |
